# 1 **Preterm Birth and Neonatal Mortality in Selected Slums in** 2 **and around Dhaka City of Bangladesh: A Cohort Study**

3 Abdur Razzaque<sup>1\*</sup>, Anisur Rahman<sup>1</sup>, Razib Chowdhury<sup>1</sup>, AHM Golam Mustafa<sup>1</sup>, Shakera  
4 Naima<sup>1</sup>, Farzana Begum<sup>1</sup>, Sohana Shafique<sup>1</sup>, Bidhan Krishna Sarker<sup>1</sup>, Mohammad Zahirul  
5 Islam<sup>2</sup>, Minjoon Kim<sup>3</sup>, Margub Aref Jahangir<sup>4</sup>, Ziaul Matin<sup>5</sup>, Jannatul Ferdous<sup>6</sup>, Maya  
6 Vandenant<sup>7</sup>, Daniel D Reidpath<sup>8</sup>

7

8 <sup>1</sup>International Centre for Diarrheal Disease Research, Bangladesh (icddr,b)

9 <sup>2</sup>Health Specialist, Embassy of Sweden, Bangladesh

10 <sup>3</sup>Planning Specialist, Maternal Newborn Health, UNICEF New York

11 <sup>4</sup>Health Officer (Urban), UNICEF Bangladesh

12 <sup>5</sup>Manager, Health Section, UNICEF Bangladesh

13 <sup>6</sup>Health Officer, UNICEF Bangladesh

14 <sup>7</sup>Chief Health, UNICEF Bangladesh

15 <sup>8</sup>Ex-Sr. Division Director, icddr,b

16

17 \*Corresponding author

18 **E-mail:** [razzaque@icddr.org](mailto:razzaque@icddr.org)

# 19 **Preterm Birth and Neonatal Mortality in Selected Slums in** 20 **and around Dhaka City of Bangladesh: A Cohort Study**

## 21 **Abstract:**

### 22 **Background:**

23 Although under-five mortality declined appreciably in Bangladesh over the last few decades,  
24 neonatal mortality still remains high. The objective of the study is to assess the level and  
25 determinants of preterm birth and the contribution of preterm birth to neonatal mortality.

### 26 **Methods:**

27 Data for this study came from selected slums in and around Dhaka city, where; since 2015, icddr,b  
28 has been maintaining the Health and Demographic Surveillance System (HDSS). The HDSS data  
29 were collected by female Field Workers by visiting each household every three months; however,  
30 during the visit, data on Last Menstrual Period (LMP) were also collected by asking each eligible  
31 woman to ascertain the date of conception. Gestational age was estimated in complete weeks by  
32 subtracting LMP from the date of pregnancy outcome. In this study, 6,989 livebirths were recorded  
33 by HDSS during 2016-2018, and these births were followed for neonatal survival; both bivariate  
34 and multivariate analyses were performed.

### 35 **Results:**

36 Out of total births, 21.7% were born preterm (before 37 weeks of gestation), and sub-categories  
37 were: 2.19% for very preterm (28 to 31 weeks), 3.81% for moderate preterm (32 to 33 weeks), and  
38 15.71% for late preterm (34 to 36 weeks). The study revealed that preterm babies contributed to

39 39.6% of neonatal deaths; however, the probability of death was very high on the 1<sup>st</sup> day of birth  
40 (0.124 for very preterm, 0.048 for moderate preterm, 0.024 for late preterm, and 0.013 for term  
41 birth), and continued until the 3<sup>rd</sup> day. In the regression analysis, compared to the term neonates,  
42 the odds of neonatal mortality were 8.74 (CI: 5.68, 13.45,  $p < 0.01$ ), 4.05 (CI: 2.64, 6.22,  $p < 0.01$ )  
43 and 1.48 (CI: 1.05, 2.08,  $p < 0.05$ ) respectively for very, moderate, and late preterm birth categories.  
44 The population attributable fraction for neonatal mortality was 23%, and sub-categories were 14%  
45 for very preterm, 10% for moderate preterm, and 6% for late preterm.

## 46 **Conclusions:**

47 Although urban slums are in proximity to many health facilities, a substantial proportion of  
48 preterm birth contributed to neonatal deaths. So, pregnant women should be targeted, to ensure  
49 timely care during pregnancy, delivery, and post-partum periods to improve the survival of new-  
50 borns in general and preterm birth in particular.

51

52 **Keywords:** Preterm Birth, Neonatal Mortality, Slums, Bangladesh

## 53 **Introduction:**

54 Globally, under-five mortality rates although are improving, neonatal mortality rates have shown  
55 much less progress. In Bangladesh, neonatal mortality accounts for 69% deaths of infants and 66%  
56 deaths of under-five children [1]. To improve the situation, the Sustainable Development Goal 3  
57 (SDG3) has proposed to reduce under-five death further, and each country should target to reduce  
58 the neonatal mortality rate to at least 12 per 1,000 livebirths by 2030 [2].

59 The survival chance of a baby depends on gestation age. In fact, preterm is defined as babies born  
60 before 37 completed weeks of gestation, while categories of preterm births are: a) very preterm  
61 (28 to 31 weeks); b) moderate preterm (32 to 33 weeks); and c) late preterm (34 to 36 weeks); those  
62 born at 37 or more weeks of gestation was classified as term birth. Globally, an estimated 15 million  
63 babies are born preterm each year (more than one in 10 babies); two-fifth of these birth were in  
64 south Asia and sub-Saharan Africa [3, 4]. At the national level, preterm birth is about 5% in the  
65 developed countries, while it is 25% in the low-medium income countries [5]; however, the  
66 preterm birth rate is increasing in some developed countries [6].

67 Preterm birth complications are estimated to be responsible for 35% of the world's 3.1 million  
68 annual neonatal deaths, and are now the second most common cause of death after the economic  
69 cost of preterm birth is high in terms of neonate. The risk of death of premature babies is at a  
70 higher level during the neonatal period than those born at term, especially in developing countries,  
71 where about half of all mothers give birth at home without a skilled birth attendant [7].  
72 Complications of preterm births are the leading direct cause of neonatal mortality, accounting for  
73 approximately 1 million of almost 4 million neonatal deaths every year, and act as a risk factor for  
74 many neonatal deaths due to other causes, particularly infections [8]. Preterm babies who survive  
75 are at a higher risk for short-term and long-term morbidities [9-11]. In Bangladesh, 17.2% of

76 newborn deaths are due to complications of premature births [12]. Preterm neonates also  
77 contribute significant costs to health systems, and families of preterm newborns often experience  
78 considerable psychological and financial hardships [13, 14].

79 The decrease in neonatal mortality of preterm birth in developed countries is primarily due to  
80 better management than changes in the percentage of preterm births [15-17]; postnatal care for  
81 preterm babies in developed countries uses specialized equipment and trained doctors. Low cost  
82 and effective services appropriate to home births in low-income countries are rare [18, 19].  
83 However, some studies from high-mortality settings have demonstrated that interventions  
84 targeting home care service by a skilled community health worker for providing service to pregnant  
85 women during antenatal, delivery and postnatal period reduced neonatal mortality significantly [20-  
86 26].

87 According to the last slum census in 2014, a total of 13,938 slums were counted covering 2,227,754  
88 residents all cities and other urban areas of Bangladesh (for details, BBS 2015 [27]). Out of those,  
89 33.6% were counted in Dhaka North (11.8%), Dhaka South (12.6%) and Gazipur city corporation  
90 (9.2%). Bangladesh Urban Health Survey reported that neonatal mortality is higher in the slum  
91 areas (43.7 per 1000 livebirths) than non-slum areas (20.1 per 1000 live births). Reports also  
92 indicates the inequality of the neonatal deaths regarding the location and size of the slums as well  
93 as sex of the child [28, 29].

94 Studies of preterm birth and neonatal mortality were few, particularly among slum dwellers in  
95 developing countries, and it is due to scarcity of data. The urban HDSS has been in operation in  
96 selected slums in around Dhaka city to monitor and impact evaluation of the comprehensive  
97 primary health care services those are being provided by the Aalo clinics (model clinics). The study  
98 took advantage of using high quality HDSS data of the slum area, those at great risk of experience  
99 of preterm birth; the study slums cover about one-third of slum population of Bangladesh. The

100 objective of the study is to assess the level and determinants of preterm birth and the contribution  
101 of preterm birth to neonatal mortality using data from selected slums in and around Dhaka city.

## 102 **Methodology:**

### 103 **Setting:**

104 The study used data from urban Health and Demographic Surveillance System (urban HDSS)  
105 which operates on some purposively selected *slums* from Dhaka (North & South) and Gazipur City  
106 Corporations, where icddr,b has been maintaining the HDSS since 2015 (for detail see *Slum Health*  
107 *in Bangladesh* [29]). *Slums* are defined as a cluster of compact settlements of 5 or more households  
108 which generally grow very unsystematically and haphazardly on government and private vacant  
109 land, are prone to adverse environmental hazards and exposures [27]. Whereas the *households* are  
110 consisting of one or more people who live together and share meals from a common cooking pot,  
111 and can identify one member as head of the household. The slums were selected for the urban  
112 HDSS regarding the larger in size (>100 households per slum area), sustainable and convenient  
113 for longitudinal data collections by female Field Workers. All the inhabitants of those selected  
114 slums were interviewed for baseline census in 2015 covering 118,238 population (3.8 persons per  
115 households). After the baseline census data collections, all the households are followed in every 3  
116 months of interval. These data cover registration of conception, pregnancy outcomes (livebirths,  
117 stillbirths, induced miscarriage, and spontaneous miscarriage), deaths, marriage/divorce,  
118 migrations (in-, out-, and internal movement), changes in household composition/headship, safe  
119 motherhood practices.

120 In these slums, the under-five mortality rate is about 70% higher than those recorded in rural  
121 Matlab HDSS government-service area. In these slums, most households had one bedroom (82%)  
122 with a small dwelling area (119 sq ft). Construction materials are usually brick/cement floors

123 (88%), tin walls (70%), and tin roofs (94%). About 95% of households used pipe water for  
124 drinking, while only one-third had sanitary latrine flush to sewerage/septic tank. Sharing facilities  
125 are common in the slums, 92% shared water sources, 90% latrines, and 60% cooking places; use  
126 of electricity as a source of light is universal. Most households have electric fans (96%) and mobile  
127 phones (85%); only 60% had television and *khat*. The mean household expenditure was BDT  
128 11,981 per month (US\$ 145) and 72% of households did not have any savings [30].

## 129 **Data and measurements:**

130 During the follow-up visits, each married woman (15-49 years) was asked privately by the female  
131 Field Worker to know whether they had been menstruating or not; if not, then asked about their  
132 Last Menstrual Period (LMP) to ascertain the conception status. Once the conception was  
133 confirmed, the woman was followed for subsequent pregnancy outcomes (livebirth, stillbirth,  
134 induce miscarriage, and spontaneous miscarriage). For each livebirth, data were collected on the  
135 date of delivery, place of delivery, details on maternity care (antenatal, delivery, and postnatal  
136 practice). Gestation age was estimated by subtracting the date of delivery and the date of LMP.

137 In this study, all the livebirths in the selected slum areas (HDSS areas) for the period 2016-2018  
138 were followed for survival up to the neonatal period. During these periods, there were 6,989  
139 livebirths were registered in the HDSS area and all of them were selected, and of them, 265 died  
140 during the neonatal period. Refusal is rare and the community is always been supportive of icddr,b  
141 activities, as they get free treatment for diarrhoea from Dhaka hospital. Preterm birth was defined  
142 as a livebirth; those born between 28 and 36 weeks of gestation, and sub-categories were very  
143 preterm (28 to 31 weeks), moderate preterm (32 to 33 weeks), and late preterm (34 to 36 weeks);  
144 those born at 37 or more weeks of gestation were classified as term birth. Deliveries below 28

145 weeks of gestation age were considered either miscarriages or stillbirth, and not included in this  
146 analysis.

## 147 **Data analysis:**

148 First, neonatal mortality was calculated for each week of gestation and for gestation age categories.  
149 The relative risk of neonatal death and a 95% confidence interval were calculated using gestational  
150 week, while ‘40 weeks’ was used as reference; while for categories of gestation age, term births (37  
151 to 42 weeks) used as a reference category. The daily death rate up to the neonatal period was  
152 calculated with the number of deaths on a given day for the number of new-borns surviving on  
153 that day.

154 The population attributable fraction (percent of deaths that could be prevented if the  
155 complications of prematurity could be eliminated) was calculated for neonatal mortality and a 95%  
156 confidence interval was calculated by categories of preterm births [31]. The formula for population  
157 attributable fraction is-

158  $PAF = P_i(1 - \frac{1}{RR_i})$   $P_i$  is number of deaths per births and  $RR$  is the risk ration of  $i$ th group.

159 The dependent variables used in this study is neonatal mortality – the probability of dying after  
160 birth and before 28 days of life (died or alive). Both bivariate (percent/rate) and multivariable  
161 (logistic regression) analyses were performed. The following variables were included in the model:  
162 age of women, sex of child, education of women, mother’s working status, number of antenatal  
163 checks, complication during delivery, mode of delivery, delivery attended by, and place of delivery  
164 as independent variables. Multicollinearity has been tested using the multiple linear regression  
165 methods incorporating the variance inflation factor (VIF) and acceptable range (VIF<5.0) included  
166 in the final logistic model. SPSS version 20 was used for all analyses.



167 **Results:**

168 A total of 6,989 livebirths were followed for this study 346 livebirths were died during the study  
 169 period (Table 1). Among them, most of the mother gave birth at 18-24 years of age (54.6%)  
 170 followed by the 25 or more years (36.7%) and only 8.7% women gave birth at their adolescence.  
 171 Most of the mother completed 5 or more years of schooling (50.3%) and 28% of mother had no  
 172 formal education. During the study, nearly one-fourth of the women had worked outside (26.3%).  
 173 Most of the mother gave birth normally (71.3%) and using the unskilled birth attendants (63.7%),  
 174 though the hospital delivery is higher than the home delivery (51.4% vs 48.6%). Most of the  
 175 mother received 1-3 antenatal care (ANC) visits (47.2%), followed by 4 or more ANC vists  
 176 (36.8%) and 16% of the women had not received any ANC visits. Most of the births are term  
 177 births (78.3%) and rest of them are preterm births in different categories.

178 Table 1. Distribution of total sample

| <b>Sociodemographic characteristics</b> | <b>Survive (N= 6643)</b> | <b>Death (N=346)</b> | <b>Total (N=6989)</b> |
|-----------------------------------------|--------------------------|----------------------|-----------------------|
| <b>Mother's age (years)</b>             |                          |                      |                       |
| <18                                     | 565 (92.9%)              | 43 (7.1%)            | 608 (8.7%)            |
| 18-24                                   | 3623 (94.9%)             | 193 (5.1%)           | 3816 (54.6%)          |
| 25 or more                              | 2455 (95.7%)             | 110 (4.3%)           | 2565 ( 36.7%)         |
| <b>Years of schooling of mother</b>     |                          |                      |                       |
| None                                    | 1848 (94.2%)             | 114 (5.8%)           | 1962 (28.1%)          |
| 1-4                                     | 1431 (94.8%)             | 79 (5.2%)            | 1510 (21.6%)          |
| 5 or more                               | 3364 (95.6%)             | 153 (4.4%)           | 3517 (50.3%)          |
| <b>Mother's occupation</b>              |                          |                      |                       |

|                          |              |            |              |
|--------------------------|--------------|------------|--------------|
| Not working              | 4889 (95.0%) | 259 (5.0%) | 5148 (73.7%) |
| Working                  | 1754 (95.3%) | 87 (4.7%)  | 1841 (26.3%) |
| <b>Sex of Child</b>      |              |            |              |
| Male                     | 3389 (94.7%) | 191 (5.3%) | 3580 (51.2%) |
| Female                   | 3254 (95.5%) | 155 (4.5%) | 3409 (48.8%) |
| <b>Mode of delivery</b>  |              |            |              |
| Normal                   | 4696 (94.2%) | 288 (5.8%) | 4984 (71.3%) |
| Operation                | 1947 (97.1%) | 58 (2.9%)  | 2005 (28.7%) |
| <b>Birth attendant</b>   |              |            |              |
| Skilled                  | 2446 (96.5%) | 90 (3.5%)  | 2536 (36.3%) |
| Unskilled                | 4197 (94.3%) | 256 (5.7%) | 4453 (63.7%) |
| <b>Place of delivery</b> |              |            |              |
| Home                     | 3212 (94.5%) | 187 (5.5%) | 3399 (48.6%) |
| Hospital                 | 3431 (95.6%) | 159 (4.4%) | 3590 (51.4%) |
| <b>ANC visits</b>        |              |            |              |
| No visits                | 1048 (93.8)  | 69 (6.2%)  | 1117 (16.0%) |
| 1-3 visits               | 3111 (94.2%) | 190 (5.8%) | 3301 (47.2%) |
| 4 or morevisits          | 2484 (96.6%) | 87 (3.4%)  | 2571 (36.8%) |
| <b>Preterm birth</b>     |              |            |              |
| Very preterm             | 118 (78.1%)  | 33 (21.9%) | 151 (2.2%)   |
| Moderate preterm         | 231 (86.2%)  | 37 (13.8%) | 268 (3.8%)   |
| Late preterm             | 1039 (94.7%) | 218 (5.3%) | 1097 (15.7%) |
| Term birth               | 5255 (96.0%) | 218 (4.0%) | 5473 (78.3%) |

180 Both the numbers of births (0.20% to 1.32%) and the number of deaths (1.51% to 4.91%) were  
 181 very low between 28 and 32 weeks of gestation (Table 2). From gestation age 34 weeks, the number  
 182 of births started to increase gradually and reached from 255 (3.22%) to 671 (9.60%) at gestation  
 183 age 37 and to 1513 (21.65%) at gestation age 39. Then the number of births declined gradually to  
 184 385 (5.51%) at gestation age 42. On the other hand, the number of deaths was 12 (4.53%) at  
 185 gestation age 34 and increased to 20 (7.55%) at gestation age 37, and to 39 (14.72%) at gestation  
 186 age 39, then declined to 12 (4.53%) at gestation age 42 with a peak of 45 (16.98%) at gestation age  
 187 40. The relative risks of neonatal mortality were very high at gestation age 31 (4.02 times); however,  
 188 with exceptionally high risk at gestation age 28 (9.92 times), followed by gestation age 30 (7.21  
 189 times). For gestation age categories 36 to 39 weeks and for categories 41 to 42 weeks, relative risks  
 190 were lower than 1.00, which means that mortalities were lower at these ages than those recorded  
 191 for gestation age 40 weeks.

192 Table 2: Distribution of births, deaths, neonatal mortality rates and relative risks by gestational  
 193 age

| <b>Gestational age (weeks)</b> | <b>Number of birth (percent)</b> | <b>Number of death (percent)</b> | <b>NMR (per 1,000 livebirths)</b> | <b>RR (95% CI)</b> |
|--------------------------------|----------------------------------|----------------------------------|-----------------------------------|--------------------|
| <b>28</b>                      | 14(0.20)                         | 5(1.88)                          | 357.1                             | 9.92(1.75-21.64)   |
| <b>29</b>                      | 19(0.27)                         | 4(1.51)                          | 210.5                             | 5.84(2.33-14.61)   |
| <b>30</b>                      | 50(0.72)                         | 13(4.91)                         | 260.0                             | 7.21(4.16-12.49)   |
| <b>31</b>                      | 69(0.99)                         | 10(3.77)                         | 144.9                             | 4.02(2.11-7.63)    |
| <b>32</b>                      | 92(1.32)                         | 8(3.02)                          | 87.0                              | 2.41(1.17-4.96)    |
| <b>33</b>                      | 174(2.49)                        | 20(7.55)                         | 114.9                             | 3.19(1.93-5.27)    |
| <b>34</b>                      | 225(3.22)                        | 12(4.53)                         | 53.3                              | 1.48(0.79-2.75)    |
| <b>35</b>                      | 392(5.61)                        | 20(7.55)                         | 51.0                              | 1.41(0.84-2.36)    |

|                       |             |           |      |                 |
|-----------------------|-------------|-----------|------|-----------------|
| <b>36</b>             | 481(6.88)   | 13(4.91)  | 27.0 | 0.75(0.40-1.37) |
| <b>37</b>             | 671(9.60)   | 20(7.55)  | 29.8 | 0.82(0.49-1.38) |
| <b>38</b>             | 890(12.73)  | 21(7.92)  | 23.6 | 0.65(0.39-1.09) |
| <b>39</b>             | 1513(21.65) | 39(14.72) | 25.8 | 0.71(0.46-1.09) |
| <b>40<sup>a</sup></b> | 1249(17.86) | 45(16.98) | 36.0 | 1.00            |
| <b>41</b>             | 765(10.95)  | 23(8.68)  | 30.1 | 0.83(0.50-1.36) |
| <b>42</b>             | 385(5.51)   | 12(4.53)  | 31.2 | 0.86(0.46-1.61) |
| <b>All</b>            | 6989        | 265       | 37.9 | -               |

194 Note: CI= Confidence interval; NMR= Neonatal Mortality Rate; RR= Relative Risk;

195 <sup>a</sup> Reference category is 40 weeks.

196

197 Table 3 shows the number of births, number of deaths, neonatal death rates, relative risks, and  
 198 population attributable fractions by gestation age categories. Both the numbers of births (2.19%  
 199 and 3.81%) and deaths (12.08% and 10.57%) were low for gestation age categories of 28-31 and  
 200 32-33 weeks, but the number of births (15.71%) and the number of deaths (16.98%) increased  
 201 from gestation age category 34-36 weeks, while both the numbers of births (78.29%) and deaths  
 202 (60.38%) reached to peak at gestation age category 37-42 weeks. The relative risks showed a similar  
 203 pattern, higher at lower gestation age categories and lowest at gestation age category 37-42 weeks.  
 204 In fact, the mortality risk of very preterm births was 7.15 times, 3.60 times for moderate preterm  
 205 birth, 1.40 times for late preterm birth compared to term birth; for overall preterm birth (less than  
 206 37 weeks), the mortality risk was 2.37 times. The population attributable fraction for neonatal  
 207 mortality was 14% for very preterm birth, 10% for moderate preterm birth, and reduced to 6%  
 208 for late preterm birth. For overall preterm birth, the population attributable fraction was 23%.

209 Table 3: Number of births, number of deaths, neonatal death rates, relative risks, and population  
210 attributable fractions by gestation age categories

| <b>Gestation age categories<sup>+</sup></b> | <b>No. of birth (percent)</b> | <b>No. of death (percent)</b> | <b>NMR (per 1000 livebirths)</b> | <b>RR (95% CI)</b> | <b>PAF (95% CI)</b> |
|---------------------------------------------|-------------------------------|-------------------------------|----------------------------------|--------------------|---------------------|
| Very preterm                                | 153(2.19)                     | 32(12.08)                     | 209.15                           | 7.15(5.07-10.08)   | 0.14(0.15- 0.28)    |
| Moderate preterm                            | 266(3.81)                     | 28(10.57)                     | 105.25                           | 3.60(2.45-5.27)    | 0.10(0.07-0.14)     |
| Late preterm                                | 1098(15.71)                   | 45(16.98)                     | 40.98                            | 1.40(1.01-1.93)    | 0.06(0.03-0.05)     |
| Preterm                                     | 1517(21.71)                   | 105(39.63)                    | 69.21                            | 2.37(1.87-3.01)    | 0.23(0.18-0.43)     |
| Term                                        | 5472(78.29)                   | 160(60.38)                    | 29.23                            | 1.00               | -                   |
| All                                         | 6989                          | 265                           | 37.92                            | -                  | -                   |

211 Note: CI= Confidence interval; NMR= Neonatal Mortality Rate; RR= Relative risk; PAF=  
212 Population Atributable Fraction; <sup>+</sup>Preterm birth (28 and 36 weeks): Very preterm (28 to 31  
213 weeks), moderate preterm (32 to 33 weeks), and late preterm (34 to 36 weeks); Term birth (37 or  
214 more weeks).

215

216 The probability of death for each category of preterm birth as well as those of term births was very  
217 high on the day of birth (Figure 1). For very preterm birth, the probability of death on the day of  
218 birth was 0.124, 0.048 for moderate preterm, and 0.024 for late preterm; the probability of death  
219 was 0.013 for term birth. However, by the 3<sup>rd</sup> day of life, the probability of death reduced by 70%-  
220 95% for these categories of birth. During 7-28 days of life, the probability of death for term birth  
221 was 0.002, 0.016 for very preterm birth, 0.020 for moderate preterm birth, and 0.001 for late  
222 preterm birth; however, the number of cases for very preterm and late preterm birth were very  
223 few.

224 Fig 1: Daily risk of death during the first month of birth by gestational age category

225

226 Table 4 shows regression estimates of neonatal mortality by preterm birth categories. Model-I  
 227 included only preterm birth categories, while Model-II included preterm birth categories along  
 228 with the selected socio-demographic variables as independent variables. For neonatal mortality,  
 229 Model-I shows that the odds of death was 8.90 (CI: 5.84, 13.57;  $p < 0.01$ ) for very preterm birth,  
 230 3.98 (CI: 2.60, 6.07;  $p < 0.01$ ) for moderate preterm birth, and 1.42 (CI: 1.01, 1.99;  $p < 0.05$ ) for  
 231 late preterm birth compared to term birth. In fact, Model-II improved significantly, the odds of  
 232 death changed slightly, 8.66 (CI: 5.63, 13.32;  $p < 0.01$ ), 4.13 (CI: 2.69, 6.34;  $p < 0.01$ ) and 1.48 (CI:  
 233 1.05, 2.08;  $p < 0.05$ ) respectively. Among the independent variables considered here, only sex of  
 234 child (odds of death was 0.76 for girl (CI: 0.59, 0.99;  $p < 0.04$ ) and mode of delivery (odds of  
 235 death was 2.80 for normal delivery (CI: 1.69, 4.64;  $p < 0.001$ ) were found significant in this model.

236 Table 4: Logistic regression estimates of neonatal mortality (N=6908)

| <b>Variables</b>                       | <b>Model-I:<br/>Odd ratios, 95% CI</b> | <b>Model-II:<br/>Odd ratios, 95% CI</b> |
|----------------------------------------|----------------------------------------|-----------------------------------------|
| <b>Preterm birth</b>                   |                                        |                                         |
| Very preterm birth (rc=Term birth)     | 8.90***(5.84, 13.57)                   | 8.66***(5.63, 13.32)                    |
| Moderate preterm birth (rc=Term birth) | 3.98***(2.60, 6.07)                    | 4.13***(2.69, 6.34)                     |
| Late preterm birth (rc=Term birth)     | 1.42**(1.01, 1.99)                     | 1.48**(1.05, 2.08)                      |
| <b>Age of mother at birth (years)</b>  |                                        |                                         |
| <18 (rc=25 or more)                    |                                        | 1.57*(1.01, 2.44)                       |
| 18-24 (rc=25 or more)                  |                                        | 1.25(0.94, 1.66)                        |
| <b>Sex of child</b>                    |                                        |                                         |

|                                     |            |                     |
|-------------------------------------|------------|---------------------|
| Girl (rc=Boy)                       |            | 0.77*(0.59, 0.99)   |
| <b>Years of schooling of mother</b> |            |                     |
| 1-4 (rc=None)                       |            | 0.98(0.70, 1.39)    |
| 5 or more (rc=None)                 |            | 0.79(0.59, 1.06)    |
| <b>Mother's working status</b>      |            |                     |
| Not working (rc=Working)            |            | 1.03(0.77, 1.38)    |
| <b>Mode of delivery</b>             |            |                     |
| Normal (rc=Operation)               |            | 2.80***(1.69, 4.64) |
| <b>Place of delivery</b>            |            |                     |
| Home (rc=Hospital)                  |            | 0.79(0.59, 1.07)    |
| <b>Birth attendant</b>              |            |                     |
| Skilled (rc=Non-skilled)            |            | 1.03(0.68, 1.54)    |
| <b>No. of antenatal visits</b>      |            |                     |
| 1-3 (rc=None)                       |            | 1.16(0.82, 1.65)    |
| 4 or more (rc=None)                 |            | 0.76(0.51, 1.14)    |
| <b>Constant</b>                     | 0.000      | 0.000               |
| -2 Loglikelihood (df)               | 2149.53(3) | 2092.74 (14)        |
| LR chi2 (p-value)                   | (0.000)    | (0.000)             |
| Pseudo R <sup>2</sup>               | 0.051      | 0.080               |

237 Note: rc=Reference category; df=degrees of freedom; Model-I: preterm birth; Model-II: preterm  
 238 birth along with selected socio-demographic and reproductive healthcare related factors; Very  
 239 preterm=<32 weeks , moderate preterm= 32-33 weeks, late preterm=34-36 weeks, 37 or more=  
 240 term birth.

## 241 Discussion

242 This study analysed the prospective cohort data for estimating the effects of preterm birth on  
243 neonatal mortality in the urban poor (slum) area in Bangladesh. We used two models, where  
244 model-I showed the unadjusted effect of preterm birth on neonatal mortality and the model-II  
245 reflects it after adjusting other sociodemographic and reproductive factors. We found that every  
246 one out of five livebirths were preterm which contributed to 39.% of neonatal deaths. The neonatal  
247 mortality rate was high 37.9 per 1000 livebirths in the slum and it varied considerably by different  
248 gestational ages. The probability of death for each category of preterm birth (very=0.124,  
249 moderate=0.048, and late=0.024) and those of term birth (0.013) were very high on the day of  
250 birth; however, by 3<sup>rd</sup> day of life, the probability of death reduced substantially. Compared to the  
251 term neonates, the odds of neonatal mortality were much higher as the gestational age reduces,  
252 and the population attributable fraction reduces, respectively.

253 Estimation of gestational age based on reported LMP is usually criticised for inaccurate recall. In  
254 our study, the LMP data were collected by female Field Workers who visited each household every  
255 three months to collect HDSS routine data, while each eligible woman was asked about their  
256 menstruation status secretly. Once conception was confirmed, LMP was recorded and the woman  
257 was followed prospectively for pregnancy outcome. Rahman et al. (2019)[32] estimated the  
258 gestational age based on LMP of ultrasound-based and LMP collected by female Field Workers of  
259 Matlab HDSS, and found that both estimates were close (Cronbach's alpha=0.89). As conception  
260 data of urban HDSS is collected following a similar procedure as those of Matlab HDSS, so the  
261 urban HDSS data is believed to be of the same quality.

262 Our study found that 21.7% of births were preterm which was close to that recorded (19.4%) by  
263 Baqui et al. (2013)[33], and the one recorded (22%) by Mamun et al. (2006)[34] from two different



264 rural areas of Bangladesh. On the other hand, Rahman et al. (2019) [32] recorded a slightly higher  
265 level of preterm birth (29%) in Matlab HDSS data than our study for an earlier period (1990-1994),  
266 but for the recent period (2010-2014), the level of preterm birth has declined to almost half (11%).  
267 Our study has made an important contribution by proving community-based preterm birth data  
268 from the slum dwellers.

269 Although a large number of studies have examined socio-demographic differentials of infant and  
270 under-five mortality in Bangladesh [35-37], none of these studies have specifically examined  
271 mortality differentials among slum dwellers. Recently Razzaque et al. (2022) examined under-five  
272 mortality using the same data (HDSS) and found that it varied by the mother's working status, sex  
273 of the child, size of the baby, delivery type, presence of complication (s) during delivery, and birth  
274 interval [38]. Our current study found almost similar results while pre-term birth was included in  
275 the model. Our study indicates that the adolescent women who gave birth to a baby boy by normal  
276 delivery had higher risks of neonatal mortality compared to preterm birth. Therefore, raising  
277 awareness about late pregnancy and caesarean delivery reduces the risk of neonatal deaths in  
278 preterm births. These findings reinforce the importance of awareness and access to reproductive  
279 and maternal health care to address the infant mortality in poor urban settlements. Kannaujiya and  
280 other found that the having a girl child and c-section had less likely to die in the early neonatal  
281 period in India [39].

282 The neonatal mortality rate found in our study was about 80% higher (37.9 vs. 20.7 per 1000  
283 livebirths) than that recorded in the Matlab HDSS government area [40]. In our study area, non-  
284 use of antenatal care was higher than those in the Matlab HDSS government area (12.0% vs. 6.3%),  
285 and a higher level of home delivery (49.0% vs. 37.6%) with large proportion of pregnancy was  
286 attended by unskilled birth attendants (24.5% vs. 20.0%) [40, 41]. This has been occurring in the  
287 slum although the study area is in proximity to many types of health facilities (public, private, and

288 NGOs). In this regard, WHO and UNICEF jointly proposed that promotion for universal access  
289 to antenatal care, skilled birth attendance, and early postnatal care, would contribute to a sustained  
290 reduction in maternal and neonatal mortality [42].

291 Our study found that one in five births are preterm (21.7%), while two in five preterm births died  
292 (39.6%) during the neonatal period. The neonatal mortality rate was 209.1 (per 1,000 livebirths)  
293 for very preterm birth, 105.2 for moderate preterm birth, and 41.0 for late preterm birth. The study  
294 also found that the population attributable fraction for neonatal mortality was 23%; which states  
295 that if excess deaths of preterm births could be prevented, there would be an almost one-quarter  
296 reduction of mortality at the population-level. The population attributable fraction found in our  
297 study was slightly lower (23% vs. 33%) than that recorded in another study from a rural area of  
298 Bangladesh [33]. The higher attributable fraction documented by Baqui et al. (2008) [22] could be  
299 due to that their study area was under the intervention programme to reduce neonatal mortality,  
300 where home-based delivery was much higher than our study (91% vs. 48%).

301 The neonatal mortality rate by gestational age gives us insights into the mortality burden for  
302 preterm and term births. For very preterm birth, the neonatal mortality was high, but the  
303 proportion of death was low; while for moderate and late preterm birth, the neonatal mortalities  
304 were low, but the proportion of birth was high. Studies have reported that to improve the survival  
305 of the preterm neonates, the need for very preterm birth is quite different from those of moderate  
306 and late preterm births [7, 21, 33]. In this connection, Baqui et al. (2008) [22] reported that  
307 community-based strategies to manage newborn complications should focus on strengthening  
308 referral systems and reducing barriers to care-seeking to reach facilities quickly; however, these  
309 authors also mentioned that very little can be done for very preterm birth by community health  
310 workers in a rural community setting [7, 33]. In the HDSS neonatal mortality was very high,  
311 although slums are in proximity to many health facilities. So, intervention programme could be

312 slightly different than those tested in rural settings. In the slum population, future intervention  
313 study can be tested by targeting the pregnant women along with strong referral linkage to facility  
314 to ensure care during pregnancy, delivery, and post-partum periods; this might improve survival  
315 of the new-borns in general and preterm birth in particular.

316 The strength of the study that data came from HDSS area that maintain high quality data visiting  
317 prospectively each households every three months and data collected interviewing the respective  
318 women (for conception, delivery, and information of newborn). So, date of occurrence of the  
319 event is believed to be fairly accurate. The major limitation is the data of conception based on  
320 LMP which is criticised for inaccurate recall; however, our record conception may not be a big issue  
321 as sufficient probing is done during the data collection and during following visit it is rechecked.

## 322 **Conclusions**

323 Although urban slums are in proximity to many health facilities, neonatal mortality is still high in  
324 these slums, while a substantial proportion of preterm birth contributed to neonatal deaths. So,  
325 pregnant women especially adolescent mother and vaginally delivered in the slum should be  
326 targeted, along with strong referral linkage to facility, to ensure care during pregnancy, delivery,  
327 and post-partum periods to improve the survival of new-borns in general and preterm birth in  
328 particular, in achieving the Sustainable Development Goal 3 for Bangladesh.

329

## 330 **Abbreviations**

331 HDSS            Health and Demographic Surveillance System

332 LMP            Last Menstrual Period

|     |        |                                                        |
|-----|--------|--------------------------------------------------------|
| 333 | CI     | Confidence Interva;                                    |
| 334 | BDHS   | Bangladesh Demographic Health Survey                   |
| 335 | SDG    | Sustainable Development Goal                           |
| 336 | BDT    | Bangladeshi Taka                                       |
| 337 | SPSS   | Statistical Program for Social Science                 |
| 338 | WHO    | World Health Organization                              |
| 339 | UNICEF | United Nations International Children’s Emergency Fund |

## 340 **Declarations**

### 341 **Ethics approval and consent to participate:**

342 All the methods of this study were carried out in accordance with the Declaration of Helsinki.  
343 icddr,b’s Institutional Review Board (IRB) approved the protocol of the study (PR# 15045). A  
344 written informed consent was obtained from all subjects and/or their legal guardian(s) prior to the  
345 data collection.

### 346 **Patient consent for publication:**

347 Not required.

### 348 **Availability of Data and Materials:**

349 Data are available upon request following icddr,b’s data policy. For more details, please visit —  
350 <https://www.icddrb.org>

351 **Competing interests:**

352 None declared.

353 **Funding:**

354 The study is funded by United Nation's Children Fund, Bangladesh (Grant number: 01867)

355 **Author's contributors:**

356 AbR, AnR and RC designed the study. AbR, AHMGM and RC prepared the dataset and were  
357 involved in the preliminary analysis. AbR prepared the first draft of the manuscript. All authors  
358 participated in editing the manuscript and approved the final version for submission. The  
359 corresponding author had full access to all data and had the final responsibility for the decision to  
360 submit for publication.

361 **Acknowledgements:**

362 icddr,b acknowledges with gratitude the commitment from UNICEF/Sida for continuation of  
363 these research efforts. icddr,b is also grateful to the Government of Bangladesh for its long-term  
364 financial support and also to international core donors: Canada, Sweden and the United Kingdom.

365 **Provenance and peer review:**

366 Not commissioned; externally peer reviewed.

## 367 **References**

- 368 1. National Institute of Population Research and Training (NIPORT), ICF. Bangladesh  
369 Demographic and Health Survey 2017-18. Dhaka, Bangladesh, and Rockville, Maryland, USA:  
370 NIPORT and ICF, 2020.
- 371 2. United Nations. Sustainable Development Goals 3: Ensure healthy lives and promote  
372 well-being for all at all ages 2019 [cited 2021 22 August]. Available from:  
373 <https://sdgs.un.org/goals/goal3>.
- 374 3. Blencowe H, Cousens S, Oestergaard MZ, Chou D, Moller AB, Narwal R, et al.  
375 National, regional, and worldwide estimates of preterm birth rates in the year 2010 with time  
376 trends since 1990 for selected countries: a systematic analysis and implications. *Lancet*.  
377 2012;379(9832):2162-72. Epub 2012/06/12. doi: 10.1016/s0140-6736(12)60820-4. PubMed  
378 PMID: 22682464.
- 379 4. Chang HH, Larson J, Blencowe H, Spong CY, Howson CP, Cairns-Smith S, et al.  
380 Preventing preterm births: analysis of trends and potential reductions with interventions in 39  
381 countries with very high human development index. *Lancet*. 2013;381(9862):223-34. Epub  
382 2012/11/20. doi: 10.1016/s0140-6736(12)61856-x. PubMed PMID: 23158883; PubMed Central  
383 PMCID: PMC3572865.
- 384 5. Steer P. The epidemiology of preterm labour. *Bjog*. 2005;112 Suppl 1:1-3. Epub  
385 2005/02/18. doi: 10.1111/j.1471-0528.2005.00575.x. PubMed PMID: 15715585.
- 386 6. Goldenberg RL, Culhane JF, Iams JD, Romero R. Epidemiology and causes of preterm  
387 birth. *Lancet*. 2008;371(9606):75-84. Epub 2008/01/08. doi: 10.1016/s0140-6736(08)60074-4.  
388 PubMed PMID: 18177778; PubMed Central PMCID: PMC357134569.
- 389 7. Lawn JE, Gravett MG, Nunes TM, Rubens CE, Stanton C. Global report on preterm  
390 birth and stillbirth (1 of 7): definitions, description of the burden and opportunities to improve  
391 data. *BMC Pregnancy Childbirth*. 2010;10 Suppl 1(Suppl 1):S1. Epub 2010/03/27. doi:  
392 10.1186/1471-2393-10-s1-s1. PubMed PMID: 20233382; PubMed Central PMCID:  
393 PMC3572841772.
- 394 8. Lawn JE, Wilczynska-Ketende K, Cousens SN. Estimating the causes of 4 million  
395 neonatal deaths in the year 2000. *Int J Epidemiol*. 2006;35(3):706-18. Epub 2006/03/25. doi:  
396 10.1093/ije/dyl043. PubMed PMID: 16556647.
- 397 9. Mwaniki MK, Atieno M, Lawn JE, Newton CR. Long-term neurodevelopmental  
398 outcomes after intrauterine and neonatal insults: a systematic review. *Lancet*.  
399 2012;379(9814):445-52. Epub 2012/01/17. doi: 10.1016/s0140-6736(11)61577-8. PubMed  
400 PMID: 22244654; PubMed Central PMCID: PMC3572873721.

- 401 10. Saigal S, Doyle LW. An overview of mortality and sequelae of preterm birth from infancy  
402 to adulthood. *Lancet*. 2008;371(9608):261-9. Epub 2008/01/22. doi: 10.1016/s0140-  
403 6736(08)60136-1. PubMed PMID: 18207020.
- 404 11. van Dommelen P, Verkerk PH, van Straaten HL. Hearing loss by week of gestation and  
405 birth weight in very preterm neonates. *J Pediatr*. 2015;166(4):840-3.e1. Epub 2015/02/11. doi:  
406 10.1016/j.jpeds.2014.12.041. PubMed PMID: 25661409.
- 407 12. Research NIoP, Training - NIPORT, Health Mo, Family Welfare, ICF. Bangladesh  
408 Demographic and Health Survey 2017-18. Dhaka, Bangladesh: NIPORT/ICF, 2020.
- 409 13. Korvenranta E, Lehtonen L, Rautava L, Häkkinen U, Andersson S, Gissler M, et al.  
410 Impact of very preterm birth on health care costs at five years of age. *Pediatrics*.  
411 2010;125(5):e1109-14. Epub 2010/04/07. doi: 10.1542/peds.2009-2882. PubMed PMID:  
412 20368320.
- 413 14. Petrou S, Abangma G, Johnson S, Wolke D, Marlow N. Costs and health utilities  
414 associated with extremely preterm birth: evidence from the EPICure study. *Value Health*.  
415 2009;12(8):1124-34. Epub 2009/08/08. doi: 10.1111/j.1524-4733.2009.00580.x. PubMed PMID:  
416 19659702.
- 417 15. Gonzalez R, Merialdi M, Lincetto O, Lauer J, Becerra C, Castro R, et al. Reduction in  
418 neonatal mortality in Chile between 1990 and 2000. *Pediatrics*. 2006;117(5):e949-54. Epub  
419 2006/04/12. doi: 10.1542/peds.2005-2354. PubMed PMID: 16606682.
- 420 16. Iams JD, Goldenberg RL, Mercer BM, Moawad A, Thom E, Meis PJ, et al. The Preterm  
421 Prediction Study: recurrence risk of spontaneous preterm birth. National Institute of Child  
422 Health and Human Development Maternal-Fetal Medicine Units Network. *Am J Obstet*  
423 *Gynecol*. 1998;178(5):1035-40. Epub 1998/06/03. doi: 10.1016/s0002-9378(98)70544-7.  
424 PubMed PMID: 9609580.
- 425 17. Kramer MS, Barros FC, Demissie K, Liu S, Kiely J, Joseph KS. Does reducing infant  
426 mortality depend on preventing low birthweight? An analysis of temporal trends in the Americas.  
427 *Paediatr Perinat Epidemiol*. 2005;19(6):445-51. Epub 2005/11/05. doi: 10.1111/j.1365-  
428 3016.2005.00681.x. PubMed PMID: 16269072.
- 429 18. Bhutta ZA, Darmstadt GL, Hasan BS, Haws RA. Community-based interventions for  
430 improving perinatal and neonatal health outcomes in developing countries: a review of the  
431 evidence. *Pediatrics*. 2005;115(2 Suppl):519-617. Epub 2005/05/04. doi: 10.1542/peds.2004-  
432 1441. PubMed PMID: 15866863.
- 433 19. Martines J, Paul VK, Bhutta ZA, Koblinsky M, Soucat A, Walker N, et al. Neonatal  
434 survival: a call for action. *Lancet*. 2005;365(9465):1189-97. Epub 2005/03/30. doi:  
435 10.1016/s0140-6736(05)71882-1. PubMed PMID: 15794974.

- 436 20. Bang AT, Bang RA, Baitule SB, Reddy MH, Deshmukh MD. Effect of home-based  
437 neonatal care and management of sepsis on neonatal mortality: field trial in rural India. *Lancet*.  
438 1999;354(9194):1955-61. Epub 2000/01/06. doi: 10.1016/s0140-6736(99)03046-9. PubMed  
439 PMID: 10622298.
- 440 21. Bang AT, Reddy HM, Deshmukh MD, Baitule SB, Bang RA. Neonatal and infant  
441 mortality in the ten years (1993 to 2003) of the Gadchiroli field trial: effect of home-based  
442 neonatal care. *J Perinatol*. 2005;25 Suppl 1:S92-107. Epub 2005/03/26. doi:  
443 10.1038/sj.jp.7211277. PubMed PMID: 15791283.
- 444 22. Baqui AH, El-Arifeen S, Darmstadt GL, Ahmed S, Williams EK, Seraji HR, et al. Effect  
445 of community-based newborn-care intervention package implemented through two service-  
446 delivery strategies in Sylhet district, Bangladesh: a cluster-randomised controlled trial. *Lancet*.  
447 2008;371(9628):1936-44. Epub 2008/06/10. doi: 10.1016/s0140-6736(08)60835-1. PubMed  
448 PMID: 18539225.
- 449 23. Bhutta ZA, Memon ZA, Soofi S, Salat MS, Cousens S, Martines J. Implementing  
450 community-based perinatal care: results from a pilot study in rural Pakistan. *Bull World Health*  
451 *Organ*. 2008;86(6):452-9. Epub 2008/06/24. doi: 10.2471/blt.07.045849. PubMed PMID:  
452 18568274; PubMed Central PMCID: PMCPMC2647462.
- 453 24. Darmstadt GL, Bhutta ZA, Cousens S, Adam T, Walker N, de Bernis L. Evidence-based,  
454 cost-effective interventions: how many newborn babies can we save? *Lancet*.  
455 2005;365(9463):977-88. Epub 2005/03/16. doi: 10.1016/s0140-6736(05)71088-6. PubMed  
456 PMID: 15767001.
- 457 25. Hanson C, Kujala S, Waiswa P, Marchant T, Schellenberg J. Community-based  
458 approaches for neonatal survival: meta-analyses of randomized trial data. *Bull World Health*  
459 *Organ*. 2017;95(6):453-64c. Epub 2017/06/13. doi: 10.2471/blt.16.175844. PubMed PMID:  
460 28603312; PubMed Central PMCID: PMCPMC5463806.
- 461 26. Manandhar DS, Osrin D, Shrestha BP, Mesko N, Morrison J, Tumbahangphe KM, et al.  
462 Effect of a participatory intervention with women's groups on birth outcomes in Nepal: cluster-  
463 randomised controlled trial. *Lancet*. 2004;364(9438):970-9. Epub 2004/09/15. doi:  
464 10.1016/s0140-6736(04)17021-9. PubMed PMID: 15364188.
- 465 27. Statistics BBo. Census of slum areas and floating population - 2014. Statistics Division:  
466 Ministry of Planning, Government of People's Republic of Bangladesh, 2015.
- 467 28. National Institute of Population Research and Training (NIPORT) ICfDDRb, b),  
468 MEASURE Evaluation,. Bangladesh Urban Health Survey 2013 Final Report. Dhaka,  
469 Bangladesh and Chapel Hill, Nort Carolina (USA): NIPORTm icddr,b, and MEASURE  
470 Evaluation, 2015.



- 471 29. Abdur Razzaque RC, AHM Golam Mustafa. The Context of Slums in Bangladesh Slum  
472 Health in Bangladesh: Insights from Health and Demographic Surveillance. Dhaka: Health  
473 Systems and Population Studies Division, icddr,b; 2019.
- 474 30. Razzaque A, Chowdhury R, Mustafa AG. The context of slums in Bangladesh. In:  
475 Hossain MM, Majumder MAH, Chin B, Islam DMZ, Adams AM, editors. Slum Health in  
476 Bangladesh: Health System and Population Studies Division, icddr,b; 2019. p. 26-53.
- 477 31. Rockhill B, Newman B, Weinberg C. Use and misuse of population attributable fractions.  
478 Am J Public Health. 1998;88(1):15-9. Epub 1998/05/16. doi: 10.2105/ajph.88.1.15. PubMed  
479 PMID: 9584027; PubMed Central PMCID: PMCPMC1508384.
- 480 32. Rahman A, Rahman M, Pervin J, Razzaque A, Aktar S, Ahmed JU, et al. Time trends and  
481 sociodemographic determinants of preterm births in pregnancy cohorts in Matlab, Bangladesh,  
482 1990-2014. BMJ Glob Health. 2019;4(4):e001462. Epub 2019/08/20. doi: 10.1136/bmjgh-2019-  
483 001462. PubMed PMID: 31423346; PubMed Central PMCID: PMCPMC6688682.
- 484 33. Baqui AH, Rosen HE, Lee AC, Applegate JA, El Arifeen S, Rahman SM, et al. Preterm  
485 birth and neonatal mortality in a rural Bangladeshi cohort: implications for health programs. J  
486 Perinatol. 2013;33(12):977-81. Epub 2013/08/21. doi: 10.1038/jp.2013.91. PubMed PMID:  
487 23949837.
- 488 34. Mamun AA, Padmadas SS, Khatun M. Maternal health during pregnancy and perinatal  
489 mortality in Bangladesh: evidence from a large-scale community-based clinical trial. Paediatr  
490 Perinat Epidemiol. 2006;20(6):482-90. Epub 2006/10/21. doi: 10.1111/j.1365-  
491 3016.2006.00752.x. PubMed PMID: 17052283.
- 492 35. Abir T, Agho KE, Page AN, Milton AH, Dibley MJ. Risk factors for under-5 mortality:  
493 evidence from Bangladesh Demographic and Health Survey, 2004–2011. BMJ Open.  
494 2015;5(8):e006722. doi: 10.1136/bmjopen-2014-006722.
- 495 36. Chowdhury AH, Hanifi SMA, Mia MN, Bhuiya A. Socioeconomic inequalities in under-  
496 five mortality in rural Bangladesh: evidence from seven national surveys spreading over 20 years.  
497 International Journal for Equity in Health. 2017;16(1):197. doi: 10.1186/s12939-017-0693-9.
- 498 37. Quamrul HC, Rafiqul I, Kamal H. Socio-economic determinants of neonatal, post  
499 neonatal, infant and child mortality. International Journal of Sociology and Anthropology.  
500 2010;2(6):118-25.
- 501 38. Razzaque A, Chowdhury R, Mustafa AG, Begum F, Shafique S, Lawton A, et al. Levels,  
502 trends and socio-demographic determinants of infant and under-five mortalities in and around  
503 slum areas of Dhaka city, Bangladesh. SSM Popul Health. 2022;17:101033. Epub 2022/02/12.  
504 doi: 10.1016/j.ssmph.2022.101033. PubMed PMID: 35146112; PubMed Central PMCID:  
505 PMCPMC8818576.

- 506 39. Kannaujiya AK, Kumar K, Upadhyay AK, McDougal L, Raj A, James KS, et al. Effect of  
507 preterm birth on early neonatal, late neonatal, and postneonatal mortality in India. PLOS Global  
508 Public Health. 2022;2(6):e0000205. doi: 10.1371/journal.pgph.0000205.
- 509 40. Haq MZ, Haider MM, Mahmud K, Alam S, Saha SK, Barua S, et al. Health &  
510 Demographic Surveillance System, Matlab. v.52. Dhaka: icddr,b, 2019 Contract No.: Scientific  
511 Report No. 139
- 512 41. Razzaque A, Chowdhury R, Mustafa AG. Health & Demographic Surveillance System:  
513 Slums of Dhaka (North & South) and Gazipur City Corporations: Registration of Health and  
514 Demographic Events, 2017. 2018
- 515 42. WHO, UNICEF. Home visits for the newborn child: a strategy to improve survival.  
516 Geneva: World Health Organization,, 2009 Contract No.: WHO/FCH/CAH/09.02.
- 517

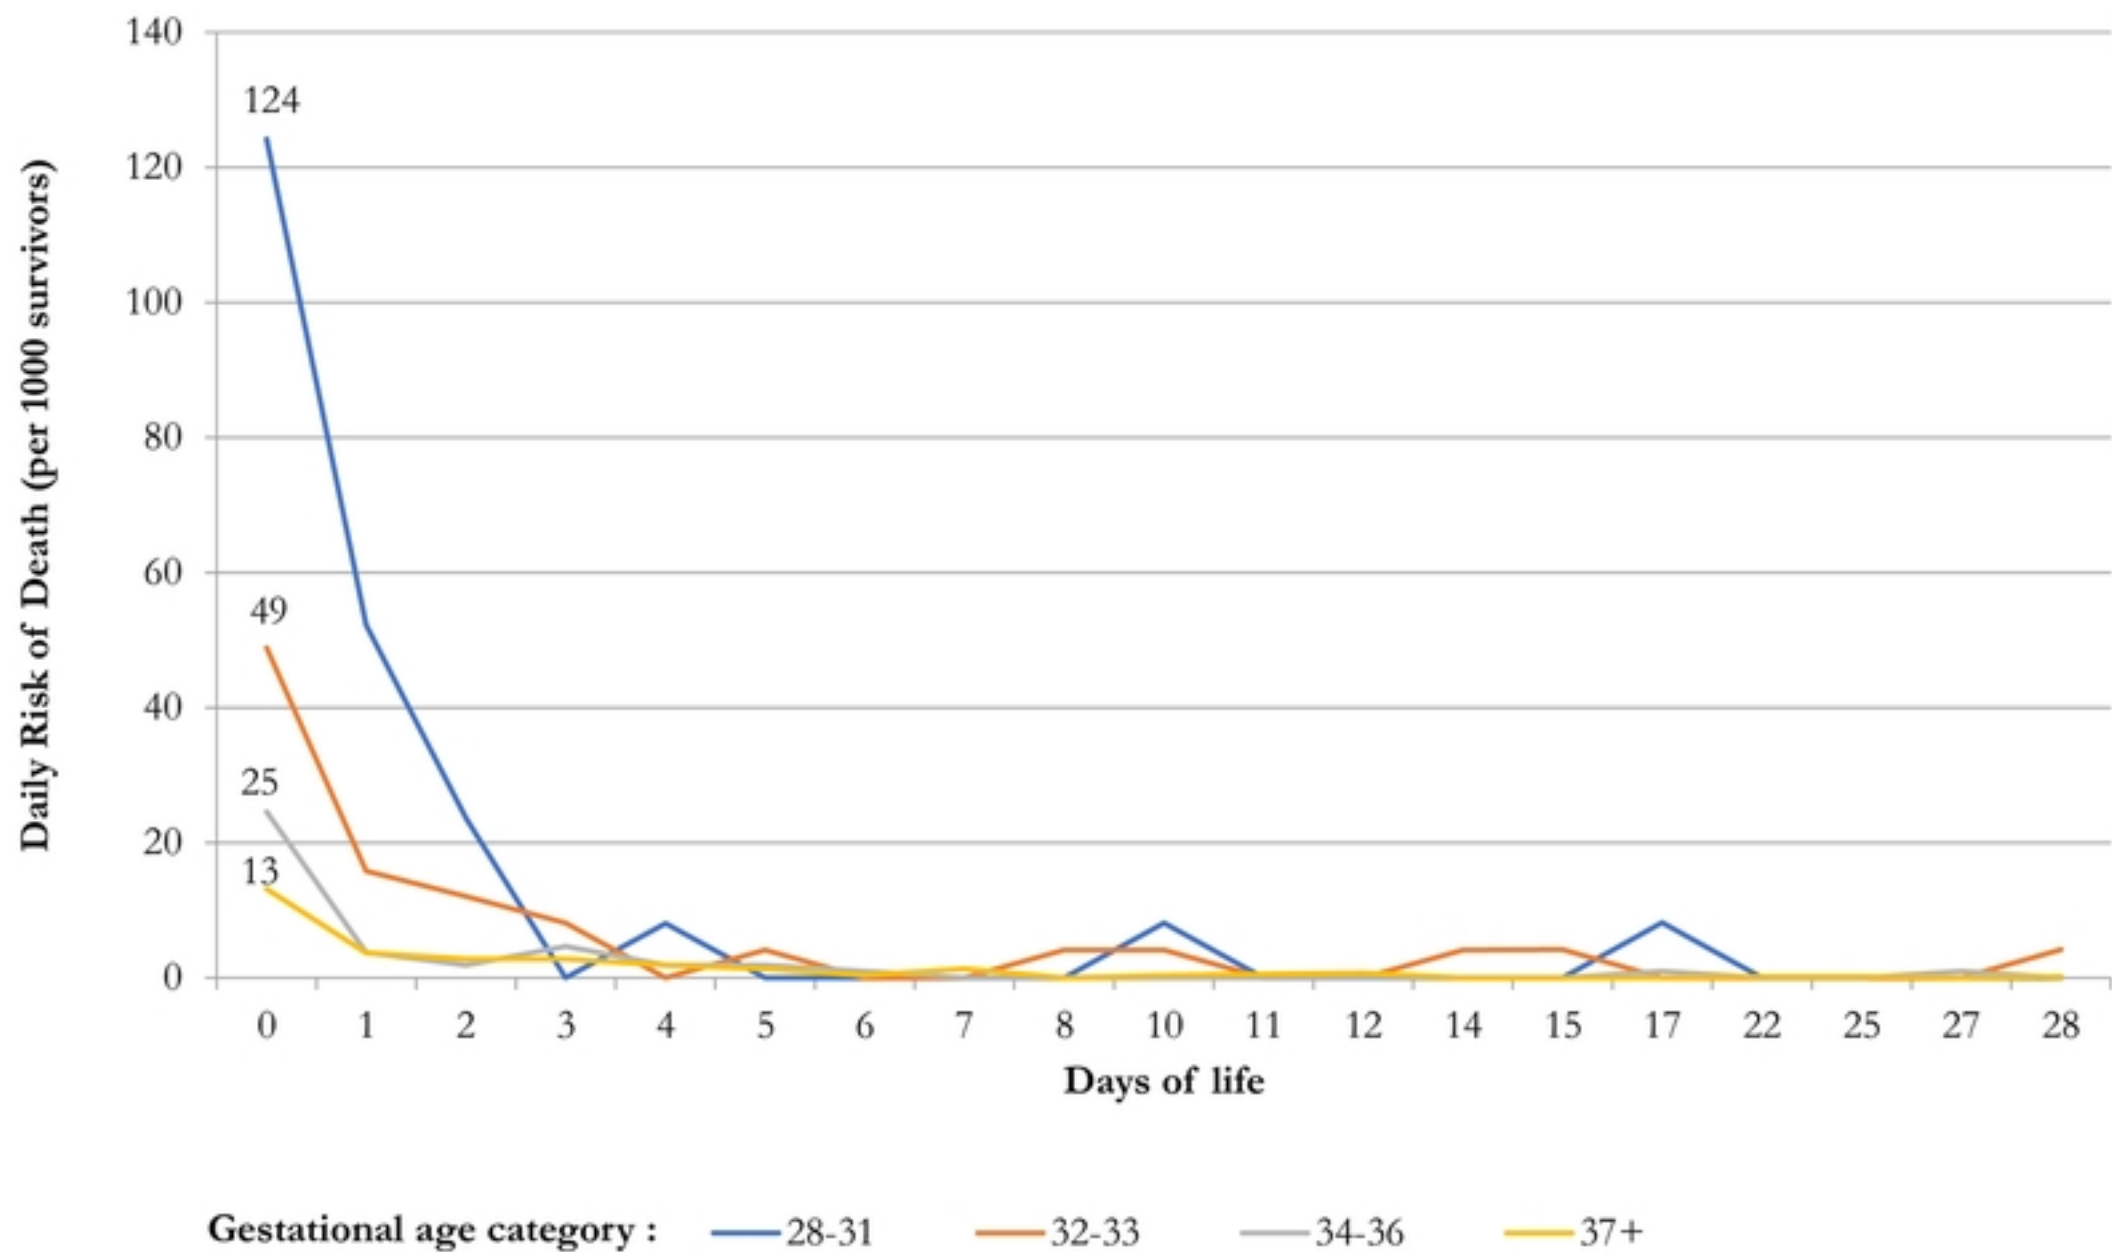

Fig 1
